# Supplementary material
Source: PubMed Central journal article supplement (PMC3925196)
Supplement: NIHMS515765-supplement-10237_2013_520_MOESM1_ESM.pdf [file NIHMS515765-supplement-10237_2013_520_MOESM1_ESM.pdf]

## **Supplementary Material**

### **Wall Deposition Patterns for Nanoparticles in an Inflamed Patient-Specific Arterial Tree**

Shaolie S. Hossain<sup>a</sup>, Thomas J.R. Hughes<sup>b</sup>, Paolo Decuzzi<sup>a</sup>

<sup>a</sup>Department of Translational Imaging and Department of Nanomedicine, The Methodist Hospital Research Institute, 6670 Bertner Avenue, Houston, TX 77030, USA

<sup>b</sup>Institute for Computational Engineering and Sciences, The University of Texas at Austin, 201 East 24<sup>th</sup> Street, Stop C0200, Austin, TX 78712, USA

**Supplementary Figure 1:** Time evolution of particle volumetric concentration at A) 1 s, B) 5.25 s, and C) 8 s. Right column plots the area-averaged quantity normalized by the number of particles injected  $n_{inj}$  and averaged over the surface area along the vessel centerline (“Z” direction).

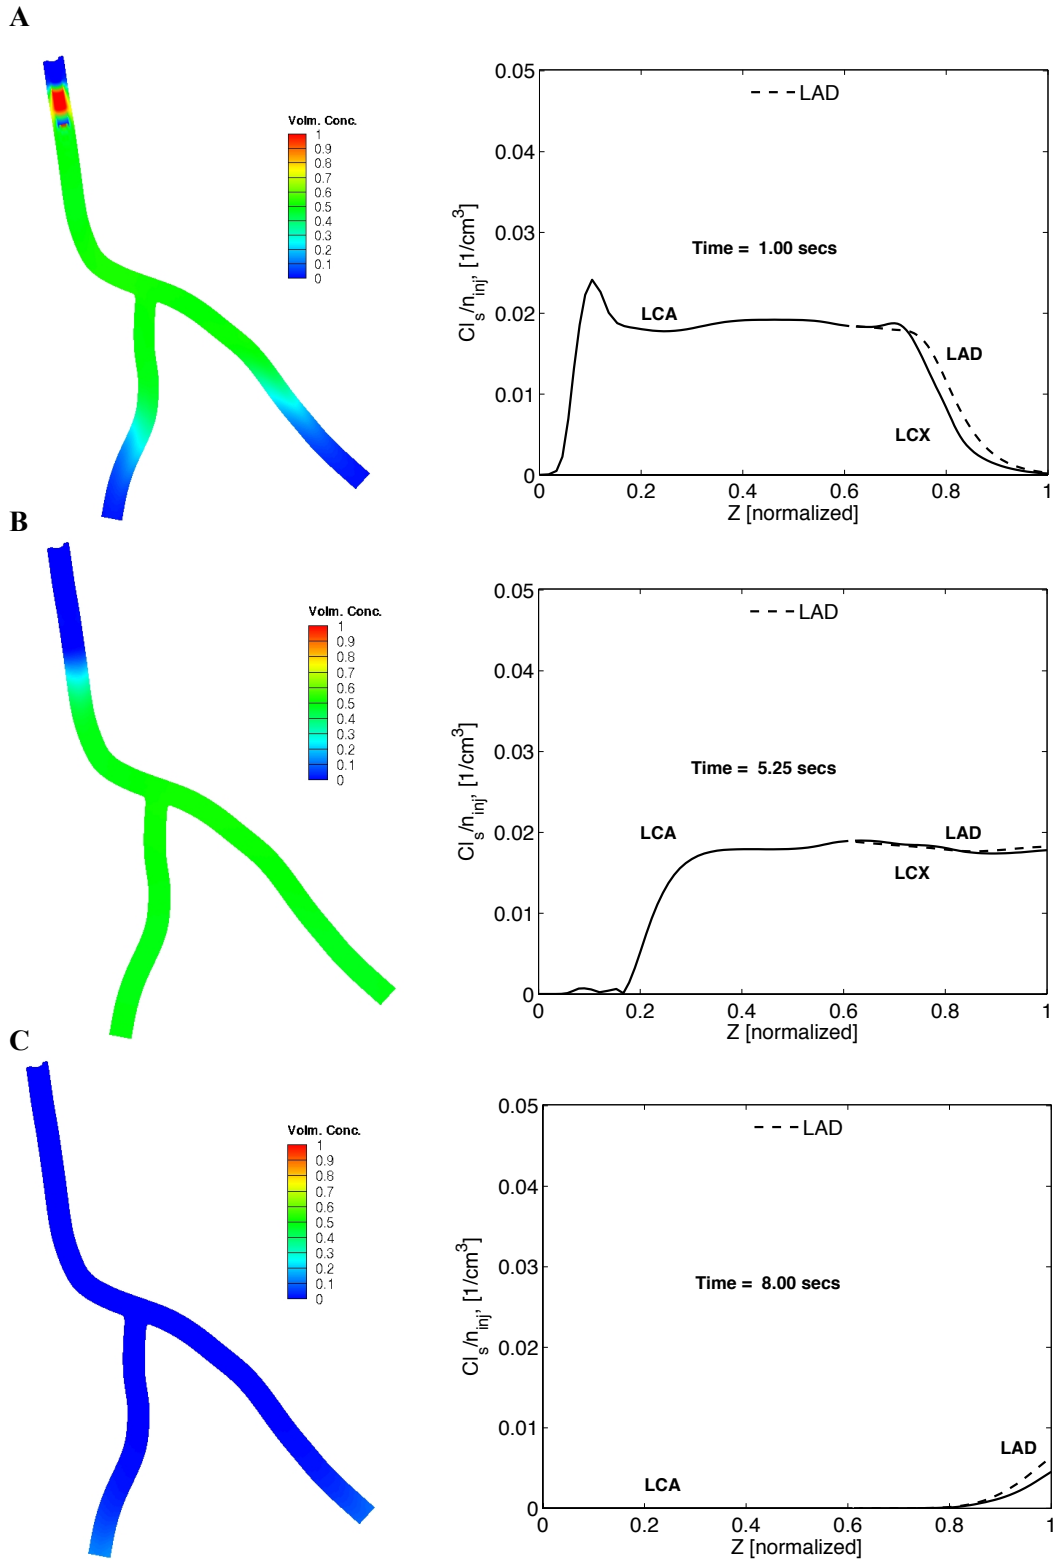

**Supplementary Figure 2:** Time-integrated particle volumetric concentration ( $\text{cm}^{-3}$ )  $C|_s$  at the lumen-wall interface at the end of simulation ( $t = 9$  s) averaged over the circumference of each cross section taken at various “Z”-locations along the vessel centerline.

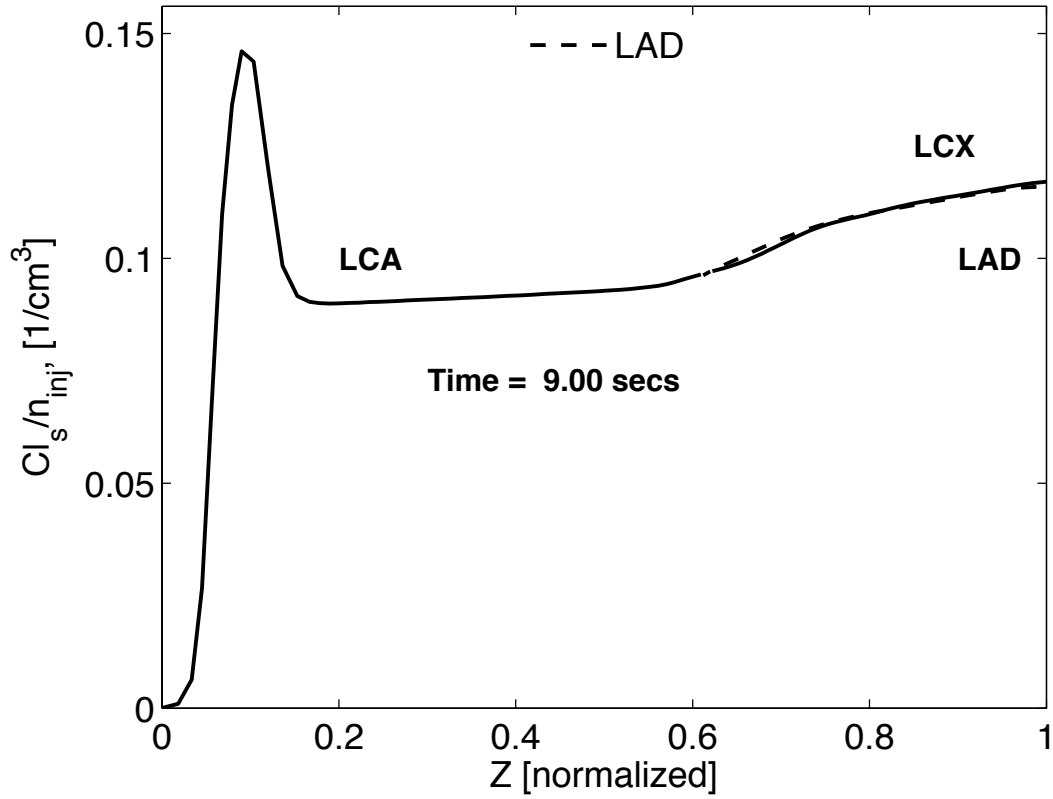

**Supplementary Figure 3:** Time-averaged wall shear stress (WSS) in Pa ( $\text{N}/\text{m}^2$ ) A) during the first 5 s of catheter injection and B) after catheter injection is ceased.

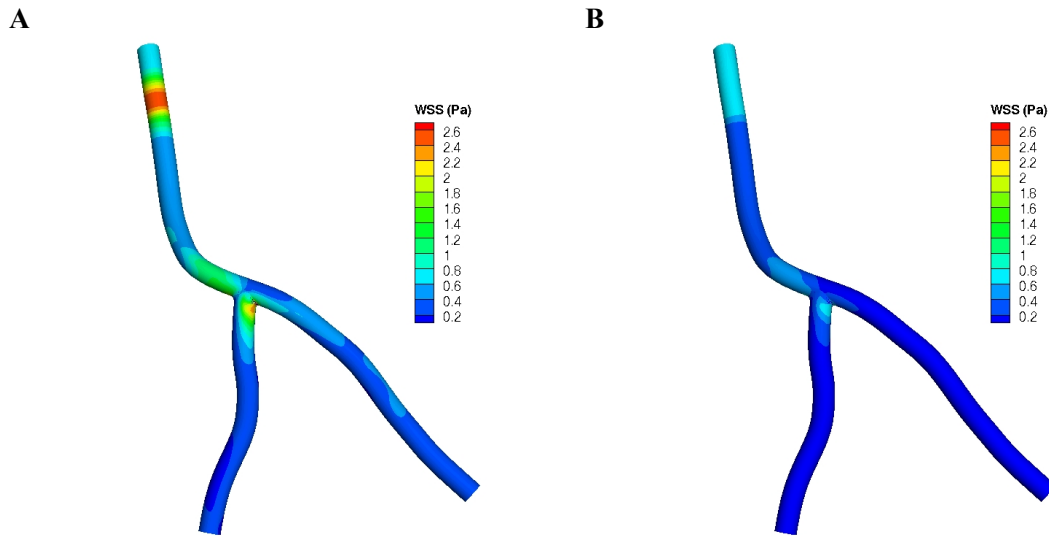

**Supplementary Figure 4:** Comparison between A) 30:70, B) 50:50, and C) 60:40 aVCAM:aEsel targeting in terms of  $(n_{\text{adh}}/n_{\text{inj}} \times A)$ , where  $n_{\text{adh}}$  is the number of adhered particles,  $n_{\text{inj}}$  is the total number of injected particles, and  $A$  is the surface area ( $\text{cm}^2$ ).

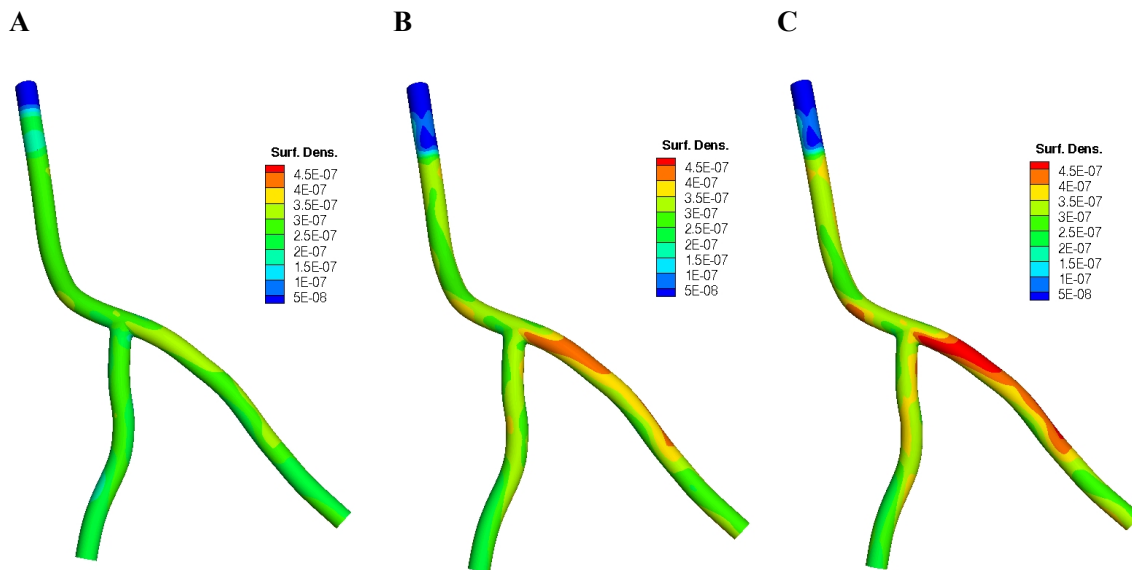

**Supplementary Figure 5: Comparison between different proportions of dual targeting.** The number of adhering  $0.5 \mu\text{m}$  particles averaged over the circumference of each cross section taken at various “ $Z$ ”-locations along the vessel centerline. Here  $n_{\text{adh}}$  is the number of adhered particles,  $n_{\text{inj}}$  is the total number of injected particles, and  $A$  is the surface area ( $\text{cm}^2$ ). Comparison between A) 30:70 aVCAM-aEsel, B) 50:50 aVCAM-aEsel and C) 60:40 aVCAM-aEsel cases. Here dashed line represents the LAD branch.

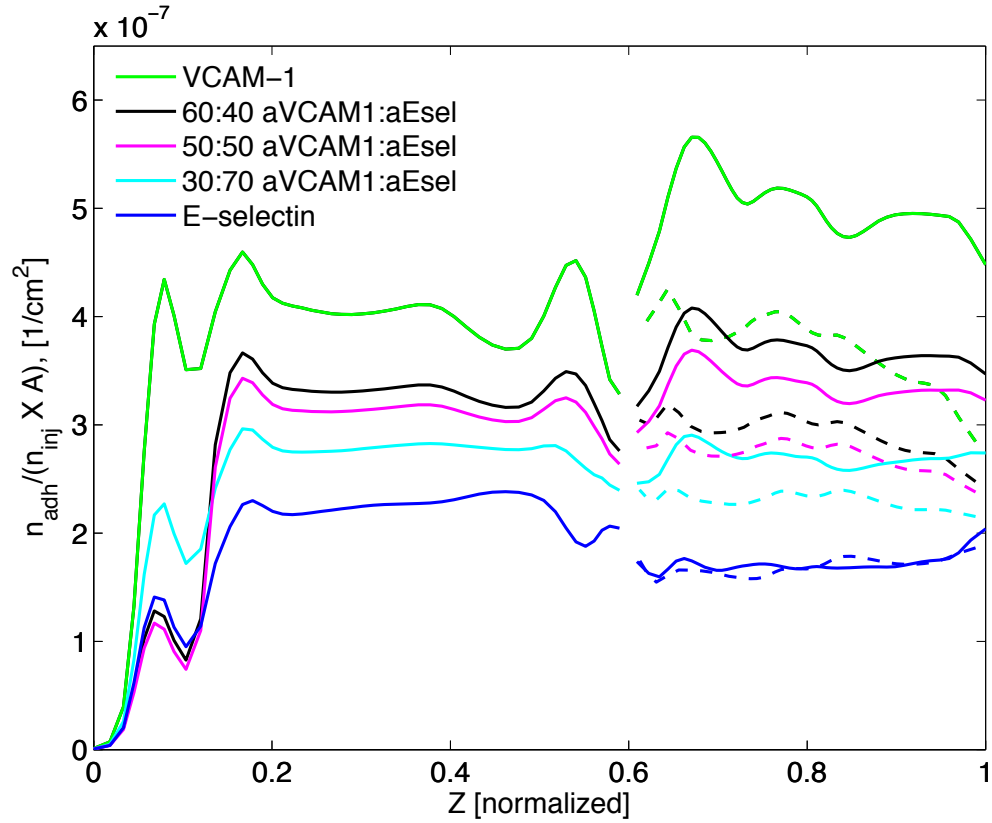

**Supplementary Figure 6: Comparison of particle size under single receptor (VCAM-1) targeting.** Spatial distribution of different sized particles: A)  $d_p = 0.1 \mu\text{m}$ , B)  $d_p = 0.5 \mu\text{m}$  and C)  $d_p = 2.0 \mu\text{m}$ , in terms of  $n_{\text{adh}}/(n_{\text{inj}} \times A)$ , where  $n_{\text{adh}}$  is the number of adhered particles,  $n_{\text{inj}}$  is the total number of injected particles and  $A$  ( $\text{cm}^2$ ).

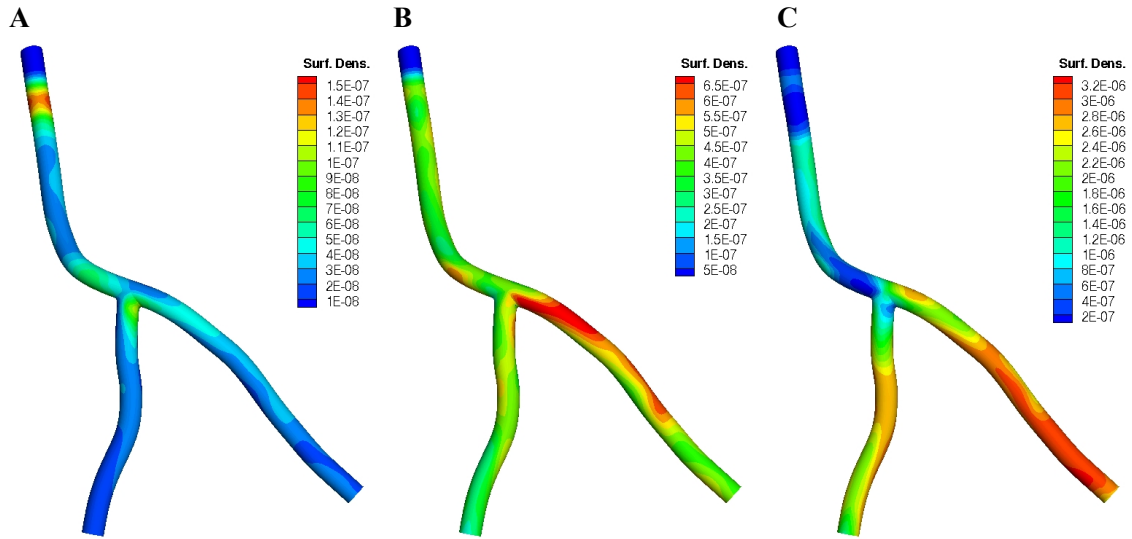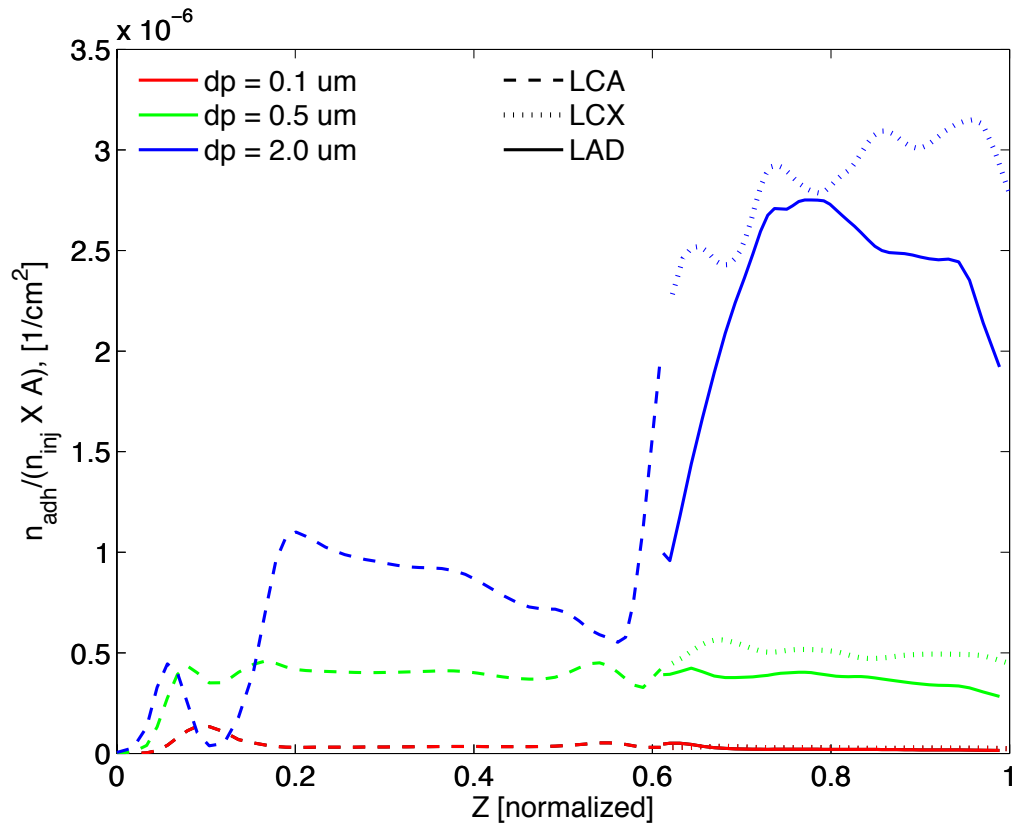

**Supplementary Figure 7: Comparison of particle size under single receptor (E-selectin) targeting.** Spatial distribution of different sized particles: A)  $d_p = 0.1 \mu\text{m}$ , B)  $d_p = 0.5 \mu\text{m}$  and C)  $d_p = 2.0 \mu\text{m}$ , averaged over the circumference of each cross section taken at various “Z”-locations along the vessel centerline in terms of  $n_{\text{adh}}/(n_{\text{inj}} \times A)$ . Here,  $n_{\text{adh}}$  is the number of adhered particles,  $n_{\text{inj}}$  is the total number of injected particles and  $A$  ( $\text{cm}^2$ ). The dashed line represents the LAD branch.

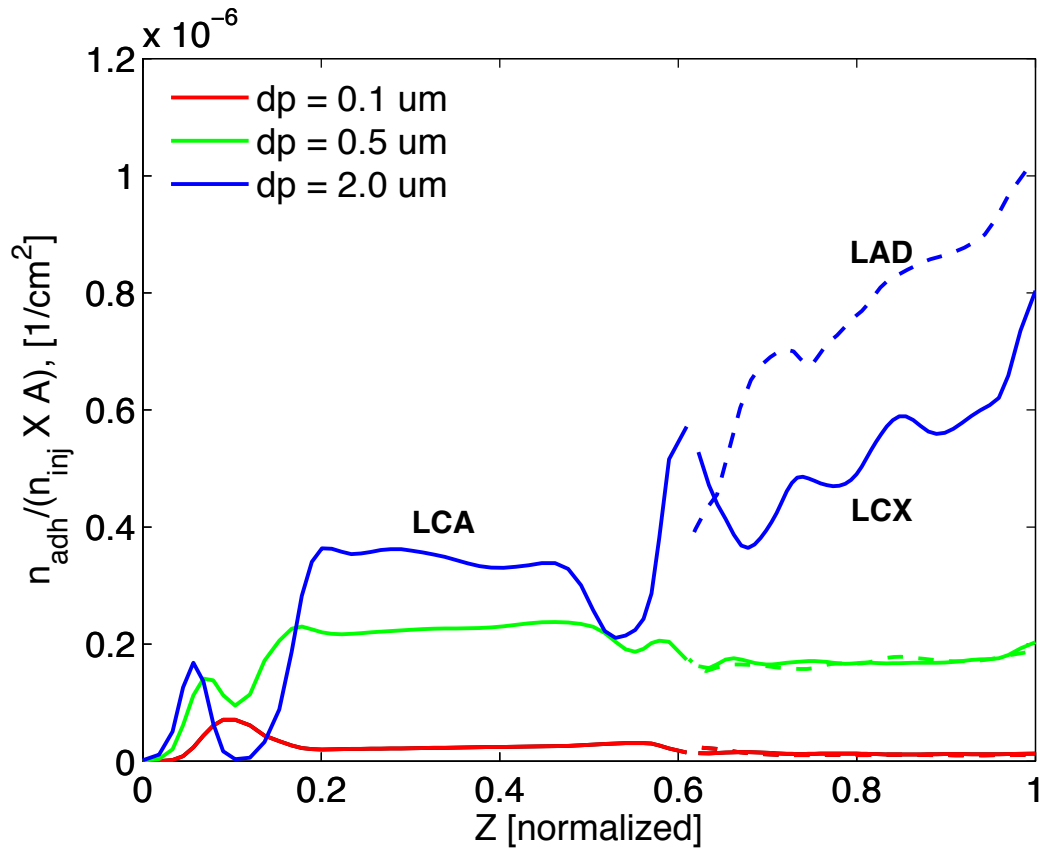

**Supplementary Table 1:** Area-averaged NP surface density in the arterial tree segment under the single- and dual-targeting approaches.

| Total area-averaged NP surface density, cm <sup>-2</sup> |                                      |                         |                         |
|----------------------------------------------------------|--------------------------------------|-------------------------|-------------------------|
| NP type                                                  | Single - receptor targeting approach |                         |                         |
| aICAM-1                                                  | 7.09 x 10 <sup>-9</sup>              | 4.51 x 10 <sup>-8</sup> | 7.48 x 10 <sup>-8</sup> |
| aVCAM-1                                                  | 3.26 x 10 <sup>-8</sup>              | 4.14 x 10 <sup>-7</sup> | 1.87 x 10 <sup>-6</sup> |
| aEsel                                                    | 1.82 x 10 <sup>-8</sup>              | 1.75 x 10 <sup>-7</sup> | 4.83 x 10 <sup>-7</sup> |
| aVCAM-1:aEsel                                            | Dual - receptor targeting approach   |                         |                         |
| 30:70                                                    | 2.25 x 10 <sup>-8</sup>              | 2.46 x 10 <sup>-7</sup> | 9.03 x 10 <sup>-7</sup> |
| 50:50                                                    | 2.41 x 10 <sup>-8</sup>              | 2.86 x 10 <sup>-7</sup> | 1.18 x 10 <sup>-6</sup> |
| 60:40                                                    | 2.55 x 10 <sup>-8</sup>              | 3.09 x 10 <sup>-7</sup> | 1.32 x 10 <sup>-6</sup> |

**Supplementary Table 2:** Heterogeneity index, H under the single- and dual-targeting

approaches. Here,  $H = \frac{N_{LCX}}{N_{LAD}}$ , and N is the surface density of particles integrated over the entire surface of the branch and divided by the total surface area of the branch.

| Heterogeneity index, H             |                         |                         |                         |
|------------------------------------|-------------------------|-------------------------|-------------------------|
| NP type                            | $d_p = 0.1 \mu\text{m}$ | $d_p = 0.5 \mu\text{m}$ | $d_p = 2.0 \mu\text{m}$ |
| Single-receptor targeting approach |                         |                         |                         |
| aICAM-1                            | 1.06                    | 0.88                    | 0.53                    |
| aVCAM-1                            | 1.21                    | 1.35                    | 1.22                    |
| aEsel                              | 1.04                    | 1.01                    | 0.70                    |
| Dual-receptor targeting approach   |                         |                         |                         |
| 30:70                              | 1.11                    | 1.17                    | 0.99                    |
| 50:50                              | 1.15                    | 1.23                    | 1.08                    |
| 60:40                              | 1.16                    | 1.26                    | 1.11                    |
